# Supplementary material
Source: PubMed Central journal article supplement (PMC3393783)
Supplement: NIHMS376810-supplement-2.pdf [file NIHMS376810-supplement-2.pdf]

Supplementary Table 1. Experimental diets and fatty acid composition

| Study Diets          | Low-fat<br>(AIN-93M) | Saturated-<br>Milk Fat | Saturated-<br>Lard Fat | PUFA<br>(Safflower oil) |
|----------------------|----------------------|------------------------|------------------------|-------------------------|
| Fat (%kcal)          | 5                    | 38                     | 38                     | 38                      |
| -Saturated (%total)  | 0.6                  | 65                     | 39                     | 9                       |
| -PUFA                | 3.9                  | 3.5                    | 11                     | 78                      |
| Protein              | 19                   | 16                     | 16                     | 16                      |
| Carbohydrate         | 66                   | 47                     | 47                     | 47                      |
| Micronutrients/Fiber | *ND                  | *ND                    | *ND                    | *ND                     |

|      |             | Milk |      | Safflower |
|------|-------------|------|------|-----------|
|      |             | Fat  | Lard | Oil       |
| 4:0  | Butyric     | 3.8  |      |           |
| 6:0  | Caproic     | 2.3  |      |           |
| 8:0  | Caprylic    | 1.1  |      |           |
| 10:0 | Capric      | 2    |      |           |
| 11:0 |             | 0.1  |      |           |
| 12:0 | Lauric      | 3.1  |      |           |
| 14:0 | Myristic    | 11.7 | 1.5  |           |
| 14:1 |             | 0.8  |      |           |
| 15:0 |             | 1.6  |      |           |
| 15:1 |             | 0    |      |           |
| 16:0 | Palmitic    | 26.2 | 24.8 | 6.5       |
| 16:1 | Palmitoleic | 1.9  | 3.1  |           |
| 17:0 | Margaric    | 0.7  |      |           |
| 17:1 |             | 0.2  |      |           |
| 18:0 | Stearic     | 12.5 | 12.3 | 2.4       |
| 18:1 | Oleic       | 28.2 | 45.1 | 13.1      |
| 18:2 | Linoleic    | 2.9  | 10   | 78        |
| 18:3 | Linolenic   | 0.5  | 0.1  |           |
| 18:4 |             | 0    |      |           |
| 20:0 | Arachidic   | 0    | 0.2  |           |
| 20:1 |             | 0.2  | 1.3  |           |
| 20:2 |             | 0    | 0.1  |           |
| 20:3 |             |      |      |           |
| 20:4 | Arachidonic | 0.1  | 0.4  |           |
| 20:5 | EPA         |      |      |           |
| 21:5 |             | 0    |      |           |
| 22:1 |             | 0    |      |           |
| 22:4 |             |      |      |           |
| 22:5 | DPA         | 0    |      |           |
| 22:6 | DHA         | 0    |      |           |

**Supplementary Table 2. Assignment to the genus level of 324 near full-length 16s rRNA sequences**

|                                             | Low-fat    | PUFA       | MF         |
|---------------------------------------------|------------|------------|------------|
| Genus                                       |            |            |            |
| <i>Bacteroides</i>                          | 8          | 31         | 34         |
| <i>Tannerella</i>                           | 1          | 1          | 2          |
| <i>Parabacteroides</i>                      | 5          | 48         | 39         |
| <i>Allobaculum</i>                          | 20         | 20         | 7          |
| <i>Anaerotruncus</i>                        | 10         | 2          | 2          |
| <i>Clostridium</i>                          | 25         | 3          |            |
| <i>Peptostreptococcaceae Incertae Sedis</i> | 2          | 1          | 4          |
| <i>Lachnospiraceae Incertae Sedis</i>       | 10         | 1          | 10         |
| <i>Erysipelotrichaceae Incertae Sedis</i>   | 24         | 1          |            |
| <i>Bilophila</i>                            |            |            | 6          |
| <i>Lactobacillus</i>                        |            |            | 5          |
| <i>Alistipes</i>                            |            |            | 3          |
| <i>Papillobacter</i>                        | 2          | 1          | 1          |
| <b>Sum</b>                                  | <b>107</b> | <b>109</b> | <b>111</b> |

**Supplementary Table 3. Sample metadata**

|                                      | <b>Clone Library</b>                                                                                          | <b>454-Pyrosequencing</b>                                           |
|--------------------------------------|---------------------------------------------------------------------------------------------------------------|---------------------------------------------------------------------|
| <b>Sequencing depths and # reads</b> | <ul style="list-style-type: none"><li>• 3525 average total sequences</li><li>• 110 sequences/sample</li></ul> | <ul style="list-style-type: none"><li>• 3000 reads/sample</li></ul> |
| <b>Total Mice</b>                    | 32                                                                                                            | 38                                                                  |
| <i>C57BL/6</i>                       | 10                                                                                                            | 23                                                                  |
| <i>IL10<sup>-/-</sup></i>            | 22                                                                                                            | 15                                                                  |

**Supplementary Table 4. Correlation between abundance of *B. wadsworthia* and colitis score calculated by Pearsons correlation coefficient**

|                                | <b>Correlation of Bw abundance and colitis score (R-value)</b> |
|--------------------------------|----------------------------------------------------------------|
| <b>Diet treatment groups</b>   |                                                                |
| SPF IL10 <sup>-/-</sup> + LF   | 0.36                                                           |
| SPF IL10 <sup>-/-</sup> + PUFA | 0.26                                                           |
| SPF IL10 <sup>-/-</sup> + MF   | 0.92                                                           |
| GF IL10 <sup>-/-</sup> + LF    | -                                                              |
| GF IL10 <sup>-/-</sup> + PUFA  | -                                                              |
| GF IL10 <sup>-/-</sup> + MF    | 0.94                                                           |
| <b>Bile treatment groups</b>   |                                                                |
| SPF IL10 <sup>-/-</sup> + PBS  | 0.27                                                           |
| SPF IL10 <sup>-/-</sup> + GC   | 0.54                                                           |
| SPF IL10 <sup>-/-</sup> + TC   | 0.96                                                           |
| GF IL10 <sup>-/-</sup> + PBS   | -                                                              |
| GF IL10 <sup>-/-</sup> + GC    | -                                                              |
| GF IL10 <sup>-/-</sup> + TC    | 0.95                                                           |
